# Supplementary material
Source: PubMed Central journal article supplement (PMC3760257)
Supplement: NIHMS477712-supplement-07.pdf [file NIHMS477712-supplement-07.pdf]

Supplementary Table 1. Sequence for shRNA (sense)

| shRNA      | The RNAi consortium number | Mature sense sequences |
|------------|----------------------------|------------------------|
| shSPRY2 #3 | TRCN0000103593             | CTCTTCTATCACTGCTCCAAT  |
| shSPRY2 #5 | TRCN0000103590             | GCAACCAACTAAACAGTTGTA  |
